# Supplementary material for: Mapping Keratoconus in Italy: Insights from 100 Centers reporting to the Italian National Rare Disease Registry
Source: Research Square preprint supplement (doi:10.21203/rs.3.rs-7807408/v1), 2025-11-17
Supplement: Supplementary file 1 [file 9c10fcc5f2c97fda7baf4b23.docx]

| **Region of reporting center** | **Reporting center** | **n** |
| --- | --- | --- |
| **Abruzzo** | Ospedale San Liberatore - Atri | 35 |
| PO Spirito Santo - Pescara | 24 |
| PO Clinicizz. SS. Annunziata - Chieti | 13 |
| PO San Salvatore L'Aquila | 2 |
| Ospedale Mazzini | 1 |
| **Basilicata** | Lungodegenza e Riabilitazione Venosa | 80 |
| PO - Matera | 2 |
| **Calabria** | AOU Mater Domini - Catanzaro | 28 |
| AO di Cosenza | 15 |
| **Campania** | AOU OO.RR. San Giovanni di Dio Ruggi d'Aragona - Salerno | 170 |
| AORN dei Colli - Napoli - PO Monaldi | 116 |
| AOU Federico II - Napoli | 109 |
| AORN dei Colli - Napoli | 49 |
| AOU dell'Università degli Studi della Campania Luigi Vanvitelli | 39 |
| AORN S. Giuseppe Moscati di Avellino | 18 |
| AO Sant'Anna e San Sebastiano - Caserta | 9 |
| AO San Pio, Benevento | 3 |
| **Emilia-Romagna** | AOSPU Ospedali Riuniti - PR | 134 |
| PO Provinciale di Reggio Emilia - Ospedale S.Maria Nuova - RE | 134 |
| PO Rimini-Santarcangelo - Ospedale Rimini | 84 |
| Presidio Unico Piacenza - Ospedale Piacenza | 52 |
| AOU di Modena - AOSPU Policlinico - MO | 44 |
| IRCCS AOU Bologna | 24 |
| AOSPU Arcispedale S.Anna - FE | 22 |
| IRCCS Scienze Neurologiche BO | 19 |
| AOU di Modena - Ospedale Civile S.Agostino - Estense | 5 |
| PO Cesena - Ospedale Cesena | 4 |
| PO Forlì - Ospedale Forlì | 4 |
| IRCCS Istituto Ortopedico Rizzoli | 1 |
| Ospedale Ravenna | 1 |
| PO Aziendale (AUSL Parma) - Ospedale Fidenza | 1 |
| PO Unico - Azienda di Bologna - Ospedale Maggiore | 1 |
| **Friuli Venezia Giulia** | Azienda Sanitaria Friuli Occidentale | 85 |
| Azienda Sanitaria Universitaria Friuli Centrale | 15 |
| Azienda Sanitaria Universitaria Giuliano Isontina | 13 |
| **Lazio** | AOU Policlinico Umberto I | 203 |
| Fondazione Policlinico A. Gemelli | 95 |
| ASL Roma 1 | 69 |
| IRCCS Ospedale Pediatrico Bambino Gesù | 48 |
| ASL Roma 1 - Osp. Oftalmico | 17 |
| **Liguria** | Ospedale Policlinico San Martino IRCCS - Genova | 75 |
| Ospedale di Lavagna | 4 |
| Istituto Giannina Gaslini IRCCS - Genova | 2 |
| **Lombardia** | Spedali Civili di Brescia - Ospedale dei Bambini | 259 |
| IRCCS Istituto Clinico Humanitas di Rozzano (MI) | 157 |
| Ospedale S. Gerardo di Monza | 62 |
| Fondazione IRCCS Policlinico San Matteo di Pavia | 35 |
| Ospedale Niguarda di Milano | 31 |
| Fondazione IRCCS Ca' Granda Ospedale Maggiore Policlinico di Milano | 18 |
| Humanitas San Pio X di Milano | 8 |
| Ospedale Fatebenefratelli e Oftalmico di Milano | 1 |
| **Marche** | AOU Ospedali Riuniti - Ancona | 87 |
| **Molise** | Ospedale Unico Regionale - PO di Termoli | 14 |
| Ospedale Unico Regionale - PO di Campobasso | 1 |
| **PA Bolzano (Trentino-Alto Adige/Suedtirol)** | Ospedale Centrale di Bolzano | 85 |
| **PA Trento (Trentino-Alto Adige/Suedtirol)** | Ospedale S. Chiara | 91 |
| **Piemonte e Valle d'Aosta** | Torino Nord Emergenza San Giovanni Bosco | 99 |
| Ospedale Oftalmico | 41 |
| AO S. Croce e Carle | 36 |
| Istituto SS Trinità - Borgomanero | 26 |
| Ospedale degli Infermi di Biella | 10 |
| AOU Osp. Maggiore della Carità - Novara e Galliate | 8 |
| Az. SS. Antonio e Biagio e C. Arrigo | 7 |
| Ospedale S.Lazzaro-Alba e S.Sprito-Bra | 6 |
| Ospedale Michele Ferrero e Pietro Ferrero - Industriali | 4 |
| Ospedali Riuniti ASL AT | 3 |
| Ospedale SS. Antonio e Margherita - Tortona | 1 |
| Ospedale Unico Plurisede | 1 |
| Ospedali Riuniti ASL Alessandria | 1 |
| Presidio Unificato Mondovì-Ceva CN1 | 1 |
| Presidio Unificato Savigliano-Saluzzo CN | 1 |
| **Puglia** | AOU Cons. Policlinico Bari | 365 |
| Ospedale Casa Sollievo della Sofferenza | 140 |
| Ospedale Bari - Di Venere - Triggiano | 101 |
| AOU OO RR Foggia | 89 |
| Ospedale Regionale EE Miulli | 74 |
| Ospedale SS. Annunziata - Moscati - Grottaglie | 7 |
| **Sardegna** | AOU CA Casula | 103 |
| PO San Francesco - NU | 60 |
| AOU SS Cliniche | 16 |
| AO - San Michele | 15 |
| **Sicilia** | AO Ospedali Riuniti Cervello - Palermo | 77 |
| AOU Policlinico di Catania Ferrarotto | 48 |
| AOU Policlinico di Messina | 26 |
| **Toscana** | AOU Senese | 37 |
| PO Zona Delle Apuane Osp. Apuane | 33 |
| AOU Careggi | 21 |
| AOU Pisana | 11 |
| Ospedale Area Aretina Nord | 5 |
| PO San Luca Lucca | 4 |
| **Umbria** | Polo Ospedaliero Foligno | 84 |
| AO di Perugia | 41 |
| AO S. Maria - Terni | 9 |
| PO Alto Tevere | 5 |
| **Veneto** | Ospedale di Mestre | 300 |
| Ospedale di Conegliano | 259 |
| Ospedale di Camposampiero | 171 |
| AOU di Padova | 133 |
| Ospedale di Treviso | 44 |
| AOU Integrata di Verona | 39 |

**Supplementary Tab. A** – Centers that reported at least one case in the 2019-2021 period.
